# Supplementary material for: Deficiency of the HGF/Met pathway leads to thyroid dysgenesis by impeding late thyroid expansion
Source: Springer Nature journal article supplement (doi:10.1038/s41467-024-47363-9), 2024-04-11
Supplement: 41467_2024_47363_MOESM1_ESM.pdf [file 41467_2024_47363_MOESM1_ESM.pdf]

## Supplementary Figures and legends

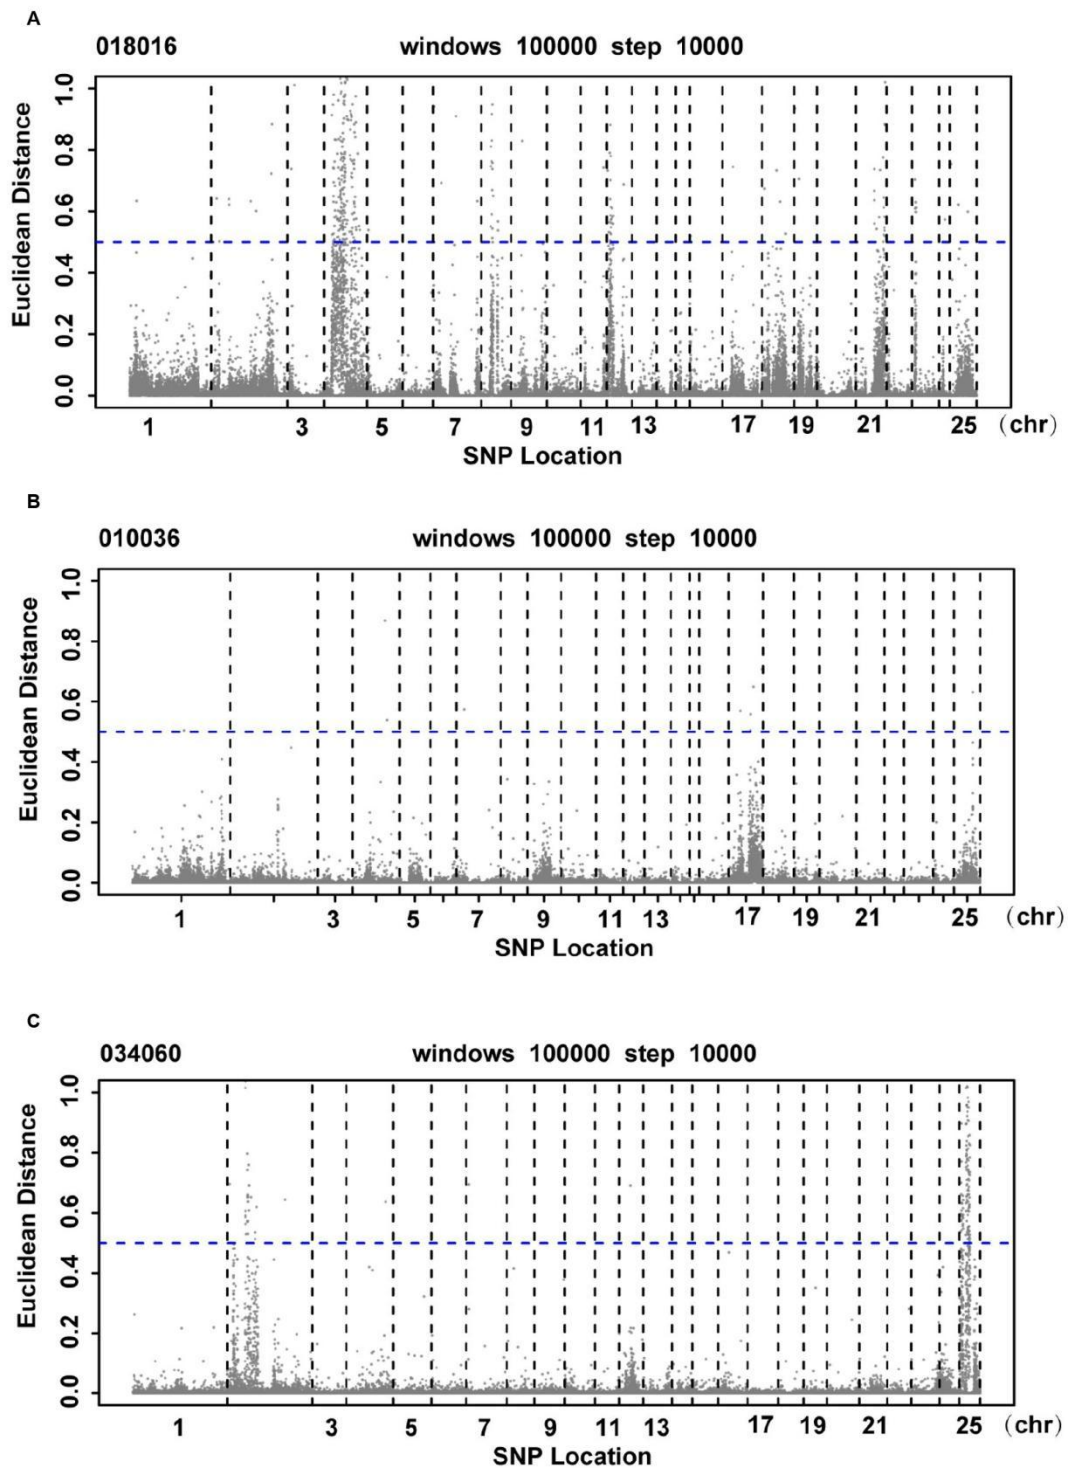

**Supplementary Figure 1. Cloning the pathogenic genes from three zebrafish lines with abnormal thyroid morphology by the bulk segregant analysis (BSA).**

Euclidean distance scores across the genome in the 018016 (A), 010036 (B), and

034060 (C) zebrafish line, respectively. For all panels, vertical dash lines delineated chromosome edges, and chromosome widths represented the relative number of SNPs on the chromosome. Windows:100,000bp. Steps:10,000bp.

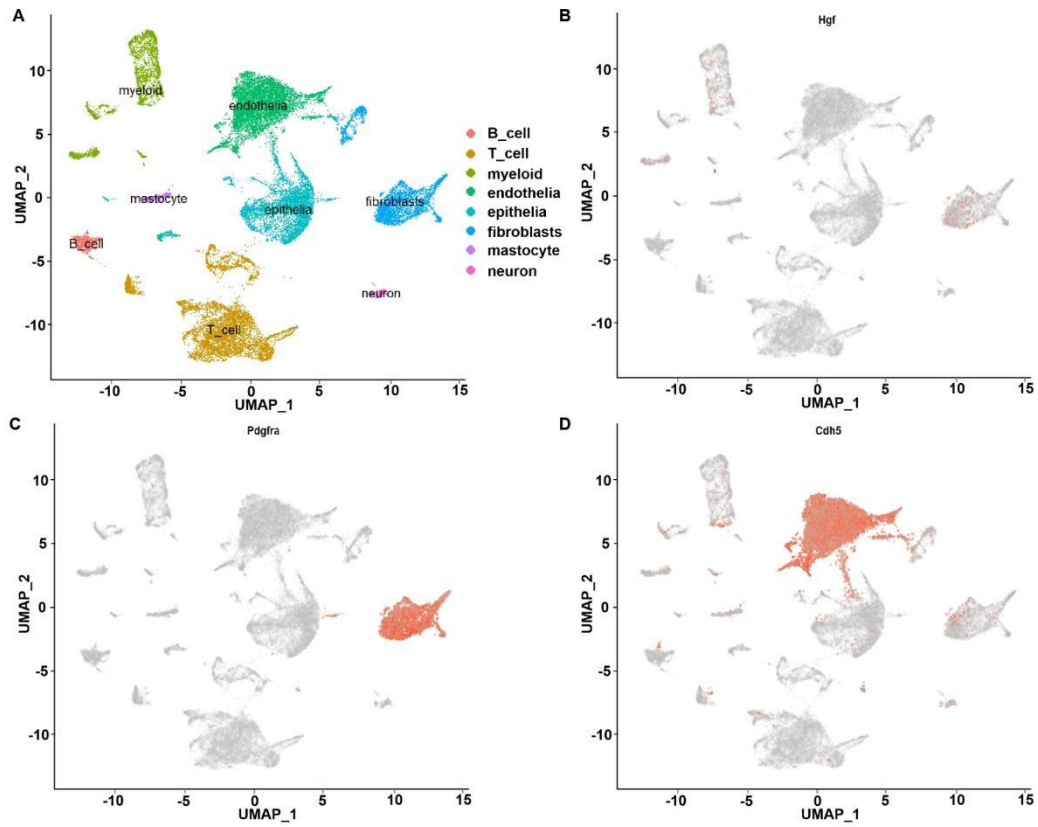

**Supplementary Figure 2. Mouse thyroid gland single-cell atlas showing that *Hgf* was mainly expressed in fibroblasts. (A-D) *Pdgfra* was a specific marker for fibroblasts, *Cdh5* was a specific marker for endothelia cells. *Hgf* was mainly expressed in the fibroblasts, followed by myeloid cells. There was almost no *Hgf* expression of in endothelia cells.**

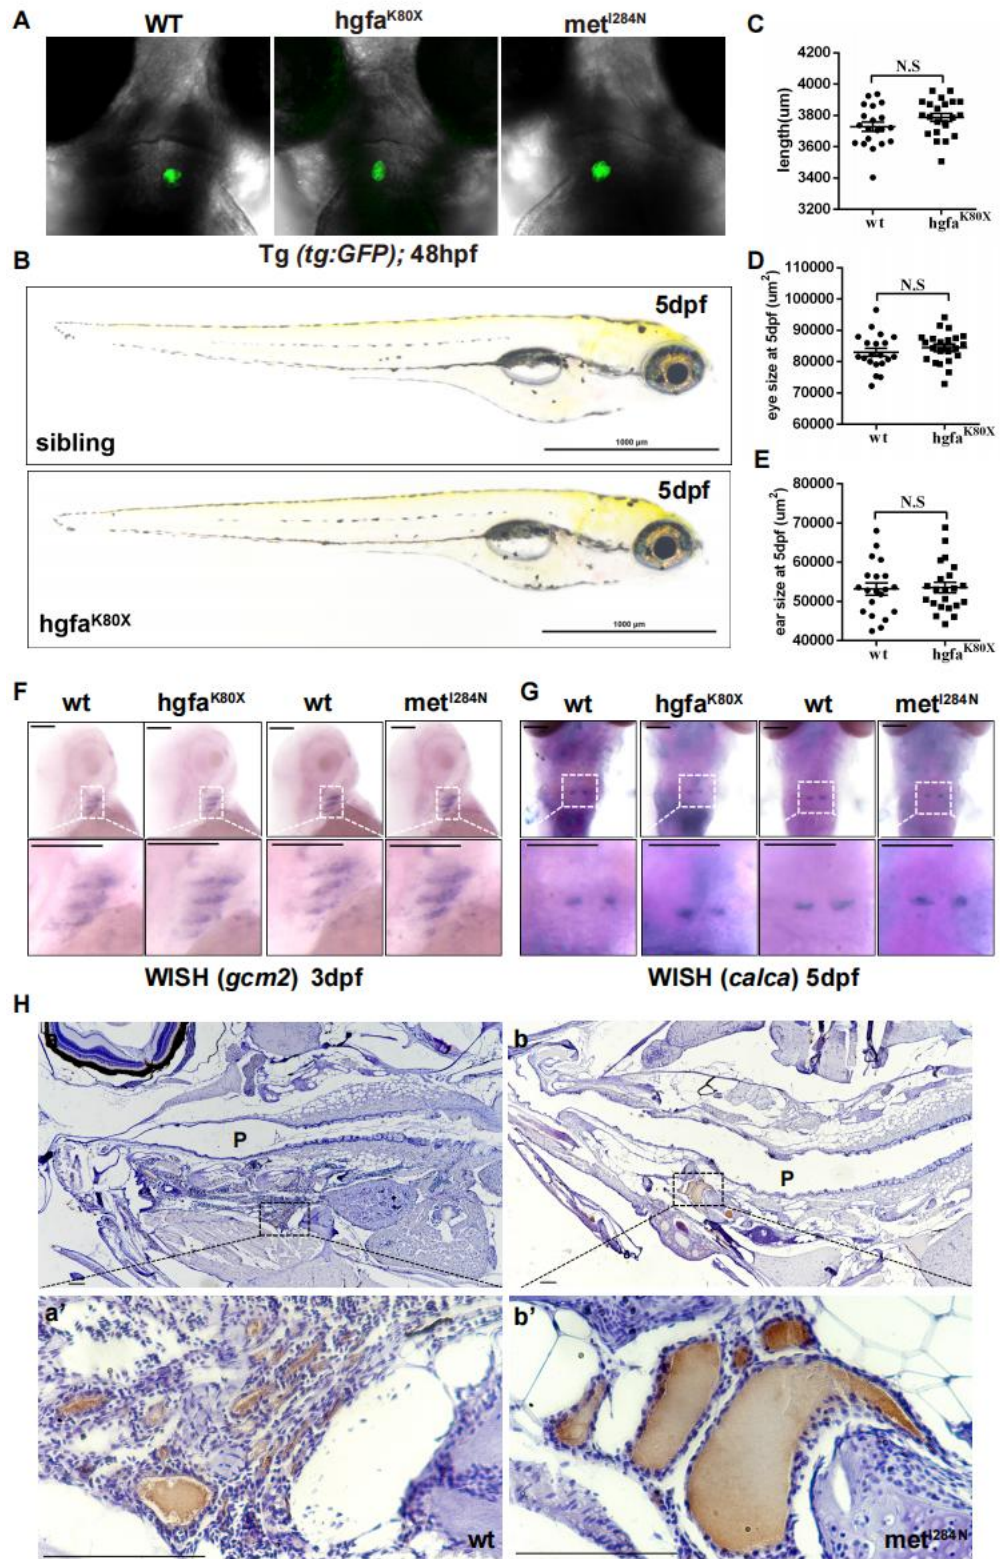

**Supplementary Figure 3. Mutant pharyngeal phenotype caused by *hgfa/met* is restricted to thyroid.** (A) *Hgfa/met* mutants presented normal thyroid primordium at 48 hpf embryos. Tg(*tg:GFP*) transgenic zebrafish lines used for analyzing the

morphology of thyroid primordium at 48 hpf and there was no difference between wildtype and *hgfa/met* mutant embryos. (B-E) The overall larvae size was unaffected in mutants at 5 dpf, including length (C), eye size (D), and ear size (E). Data are shown as mean  $\pm$  SEM, n=20 for WT, n=22 for mutants, statistical significance was determined by two sided Student's t test. (F-G) Ultimobranchial gland (marked by *calca* using WISH) and parathyroid (marked by *gcm2* using WISH), another two pharyngeal endoderm derivatives, were unaffected in 3 dpf and 5 dpf mutants, respectively. Scale bars: 100  $\mu$ m. (H) Immunohistochemical staining with thyroxine of sagittal sections of thyroid follicles in 1.5-month-old WT and *hgfa*<sup>K80X</sup> mutated zebrafish (anterior is to the left). Scale bars: 100  $\mu$ m. Source data are provided as a Source data file.

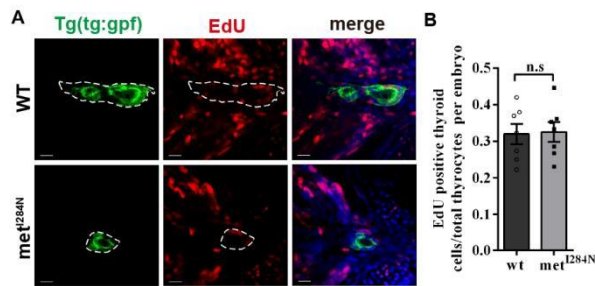

**Supplementary Figure 4. The effect of hgf/met deficiency on thyrocytes proliferation in zebrafish larvae at 4 dpf.** (A-B) Thyrocytes proliferation in WT and met<sup>1284N</sup> Tg(*tg:gfp*) transgenic zebrafish embryos, detected by EdU staining. Bars, 50  $\mu$ m. n.s, not significant. n=7 for each group, anterior is to the right. Data are presented as the mean  $\pm$  SEM. Group comparisons were performed with two-sided Student's t test. Source data are provided as a Source data file.

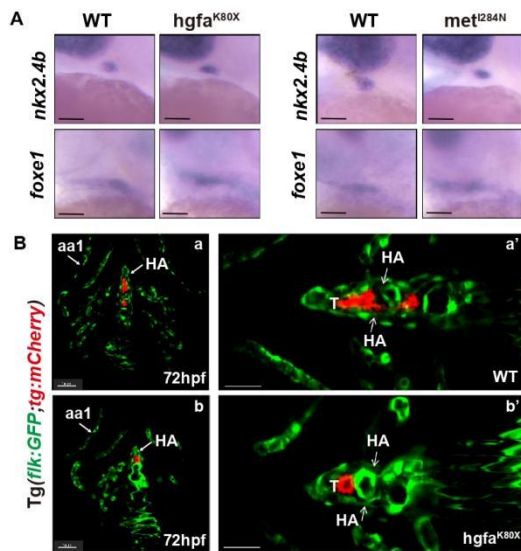

**Supplementary Figure 5. The deficiency of *hgfa* or *met* genes does not influence the expression of thyroid transcription factors in thyroid primordium and pharyngeal vessel development.** (A) The expression of *nkx2.4b* and *foxe1*, two key transcription factors involved in early thyroid development, did not showed significant difference between the wildtype or homozygous mutant zebrafish embryos at 2 dpf detected by WISH. (B) Tg(*alk:EGFP*;*tg:mCherry*) double transgenic lines used for analyzing the effect of deficiency in *hgfa* on thyroid and surrounding vessels development. As detected, truncated *hgfa* mutation in zebrafish does not affect the development of vessels surrounding the thyroid at 72 hpf embryos. aa1: aortic arch arteries 1; HA: hypobranchial artery; T: thyroid. Scale bars: 50 μm.

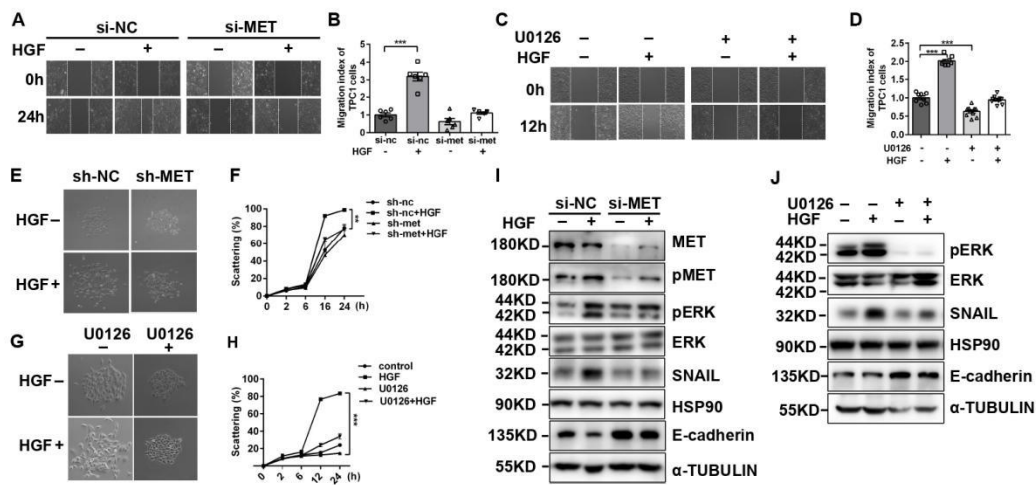

**Supplementary Figure 6. HGF/MET downregulates E-cadherin by activating MAPK-snail *in vitro*.** (A-D) HGF-induced cell migrating in TPC1 cells can be blocked by *MET* knockdown or treatment with U0126. B, n=6 for each group; D, n=8 for group control and HGF, n=10 for group U0126 and U0126+HGF. (E-H) In TPC1 cells, HGF-induced cell scattering was blocked by *MET* knockdown and U0126 treatment. N=3 for each group. (I, J) By western blot, the effects of HGF-induced increasing expression of Snail and decreased expression of E-cadherin (Cdh1) in TPC1 cells were restored by *MET* knockdown (I) and MEK inhibitors (U0126) (J). Snail, a well-known E-cadherin transcriptional repressor, is activated by MAPK signaling pathway. \*\*represents  $P < 0.01$ , \*\*\*represents  $P < 0.001$ . Data are presented as the mean  $\pm$  SEM. Group comparisons were performed with two-sided Student's t test. Source data are provided as a Source data file.



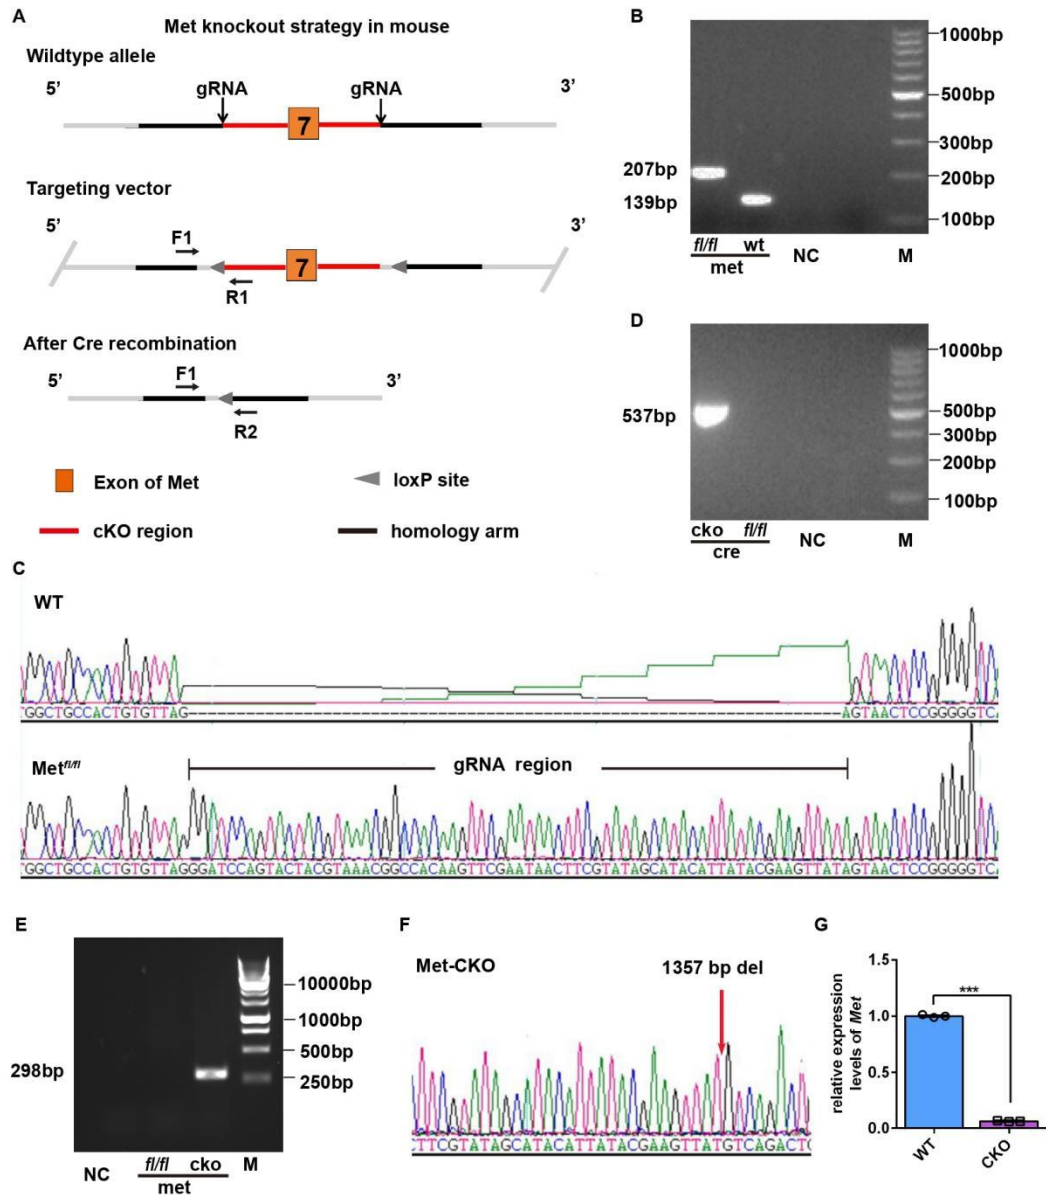

**Supplementary Figure 7. Generating a thyroid-specific *Met* knockout mouse model.** (A) Knocking out strategy of mouse *Met*. A floxed *Met* targeting vector was constructed so that an upstream *loxP* site in the intron preceded exon 7 and the other *loxP* site in the intron immediately downstream of exon 7. The *Met*<sup>fl/fl</sup> mice were crossed with Pax8-Cre transgenic mice to generate thyroid-specific *Met* knockout mice. (B-C) Routine genotyping of embryos was performed by PCR with tail DNA

using primers F1/R1. The expected sizes of the loxp allele and wild-type allele were 207 bp and 139 bp, respectively (B). Verification by Sanger sequencing (C). (D) To determine Cre expression, Cre (F/R) primers were used, generating a 537 bp fragment. (E) The thyroid-specific Met deletion were confirmed by primers F1/R2, generating a 298 bp fragment. (F) The size of effective cKO region is 1357 bp, verified by Sanger sequencing. (G) The recombination efficiency was determined by qPCR. n=3, \*\*\*represents  $P < 0.001$ . Data are presented as the mean  $\pm$  SEM. Group comparisons were performed with two-sided Student's t test. Source data are provided as a Source data file.

**Supplementary Table 1. Fine genetic mapping of 018016 family**

| chromosome | postion  | reference | alteration | mut_vaf  | wt_vaf   | variation   | gene name         | mutation                | case-ref | wt-alt |
|------------|----------|-----------|------------|----------|----------|-------------|-------------------|-------------------------|----------|--------|
| chr4       | 10650696 | C         | A          | 0.884146 | 0.487395 | MISSENSE    | NET1              | c.145G>T; p.ASP49TYR    |          |        |
| chr4       | 11334461 | G         | A          | 0.876289 | 0.467647 | MISSENSE    | CNOT4_(2_OF_2)    | c.764C>T; p.SER255LEU   |          |        |
| chr4       | 15177339 | A         | C          | 0.874016 | 0.42268  | MISSENSE    | ATP2B1A           | c.57T>G; p.ASN19LYS     | 2/60     | 0/16   |
| chr4       | 18670375 | T         | A          | 0.989744 | 0.283871 | STOP_GAINED | HGFA              | c.238A>T; p.LYS80*      | 0/100    | 0/16   |
| chr4       | 31962425 | C         | A          | 0.739496 | 0.286822 | MISSENSE    | BX324003.3        | c.759C>A; p.ASP253GLU   | 16/16    | 0/16   |
| chr4       | 36797341 | C         | G          | 0.804233 | 0.266667 | MISSENSE    | SI:CH211-209N20.1 | c.956C>G; p.THR319ARG   |          |        |
| chr4       | 36797355 | G         | C          | 0.796512 | 0.2      | MISSENSE    | SI:CH211-209N20.1 | c.970G>C; p.GLU324GLN   |          |        |
| chr4       | 36797368 | G         | A          | 0.809524 | 0.166667 | MISSENSE    | SI:CH211-209N20.1 | c.983G>A; p.ARG328LYS   |          |        |
| chr4       | 41208041 | G         | A          | 0.884876 | 0.0625   | MISSENSE    | SI:DKEY-238G7.1   | c.301G>A; p.ALA101THR   |          |        |
| chr4       | 41208151 | A         | T          | 0.97551  | 0.176471 | MISSENSE    | SI:DKEY-238G7.1   | c.411A>T; p.GLN137HIS   |          |        |
| chr4       | 42245177 | A         | G          | 0.708333 | 0.375    | MISSENSE    | SI:DKEY-250K10.1  | c.2110T>C; p.PHE704LEU  |          |        |
| chr4       | 42383693 | T         | G          | 0.977273 | 0.314741 | MISSENSE    | SI:DKEY-809.2     | c.2488A>C; p.MET830LEU  |          |        |
| chr4       | 42383713 | T         | G          | 0.972763 | 0.321429 | MISSENSE    | SI:DKEY-809.2     | c.2468A>C; p.GLN823PRO  |          |        |
| chr4       | 42486422 | T         | A          | 0.96338  | 0.352668 | MISSENSE    | BX571954.1        | c.1409T>A; p.VAL470ASP  |          |        |
| chr4       | 48351435 | C         | T          | 0.723333 | 0.27907  | MISSENSE    | SI:DKEY-9I5.4     | c.874G>A; p.GLY292ARG   |          |        |
| chr4       | 51655360 | C         | T          | 0.741573 | 0.171053 | MISSENSE    | SI:DKEYP-80D11.10 | c.3253C>T; p.ARG1085CYS |          |        |
| chr4       | 52293887 | C         | A          | 0.833333 | 0.130435 | MISSENSE    | SI:CH211-42I6.2   | c.235C>A; p.GLN79LYS    |          |        |
| chr4       | 55460525 | A         | G          | 0.894309 | 0.304878 | MISSENSE    | SI:DKEY-4E4.1     | c.649A>G; p.THR217ALA   |          |        |
| chr4       | 57103814 | G         | C          | 0.857143 | 0.085561 | MISSENSE    | SI:CH211-207E19.2 | c.2881C>G; p.HIS961ASP  |          |        |
| chr4       | 57103824 | G         | C          | 0.892857 | 0.102703 | MISSENSE    | SI:CH211-207E19.2 | c.2871C>G; p.HIS957GLN  |          |        |
| chr4       | 57103828 | C         | A          | 0.903226 | 0.103825 | MISSENSE    | SI:CH211-207E19.2 | c.2867G>T; p.TRP956LEU  |          |        |
| chr4       | 57103829 | A         | T          | 0.904762 | 0.104972 | MISSENSE    | SI:CH211-207E19.2 | c.2866T>A; p.TRP956ARG  |          |        |
| chr4       | 57103896 | A         | T          | 0.775194 | 0.212928 | MISSENSE    | SI:CH211-207E19.2 | c.2799T>A; p.ASP933GLU  |          |        |
| chr4       | 57103900 | C         | A          | 0.773438 | 0.212121 | MISSENSE    | SI:CH211-207E19.2 | c.2795G>T; p.GLY932VAL  |          |        |
| chr4       | 57835910 | A         | G          | 0.825688 | 0.160584 | MISSENSE    | SI:DKEYP-33C10.7  | c.335A>G; p.LYS112ARG   |          |        |

case-ref: indicates that reference nucleotide was verified in phenotypic embryos by Sanger sequencing;

wt-alt: indicates that alteration nucleotide was verified in wild type zebrafish by Sanger sequencing.

**Supplementary Table 2. Fine genetic mapping of 010036 family**

| chromosome | position | reference | alteration | mut_vaf  | wt_vaf   | variation | gene name         | mutation               |
|------------|----------|-----------|------------|----------|----------|-----------|-------------------|------------------------|
| chr1       | 37651562 | T         | A          | 1        | 0.375    | MISSENSE  | SI:CH211-76M11.5  | c.2862T>A; p.PHE954LEU |
| chr2       | 11579679 | T         | C          | 0.761905 | 0.477612 | MISSENSE  | GREBIL            | c.1397T>C; p.LEU466PRO |
| chr2       | 47444498 | C         | T          | 0.741935 | 0        | MISSENSE  | CABZ01078499.2    | c.2836C>T; p.PRO946SER |
| chr4       | 43456926 | A         | T          | 1        | 0        | MISSENSE  | SI:DKEY-22A18.2   | c.2616A>T; p.LYS872ASN |
| chr4       | 51814522 | A         | *,C        | 0.872727 | 0        | MISSENSE  | SI:CH211-286L10.1 | c.1586A>C; p.TYR529SER |
| chr5       | 39094997 | T         | A          | 0.719101 | 0.492063 | MISSENSE  | CU984579.1        | c.236T>A; p.MET79LYS   |
| chr5       | 39095008 | A         | G          | 0.722892 | 0.490909 | MISSENSE  | CU984579.1        | c.247A>G; p.LYS83GLU   |
| chr7       | 3894900  | C         | A          | 0.916667 | 0.454545 | MISSENSE  | SI:CH211-282J17.8 | c.370G>T; p.VAL124PHE  |
| chr7       | 4023157  | A         | T          | 1        | 0        | MISSENSE  | SI:DKEY-88N24.7   | c.75T>A; p.ASN25LYS    |
| chr7       | 4023164  | A         | G          | 1        | 0        | MISSENSE  | SI:DKEY-88N24.7   | c.68T>C; p.MET23THR    |
| chr7       | 4023167  | C         | T          | 1        | 0        | MISSENSE  | SI:DKEY-88N24.7   | c.65G>A; p.ARG22LYS    |
| chr7       | 4096558  | T         | C,*        | 0.802326 | 0        | MISSENSE  | BX284672.1        | c.358A>G; p.THR120ALA  |
| chr8       | 2363858  | A         | T          | 0.857143 | 0        | MISSENSE  | CT583679.1        | c.484A>T; p.THR162SER  |
| chr10      | 30768244 | G         | A          | 0.736842 | 0.303571 | MISSENSE  | C10H11ORF63       | c.540G>A; p.MET180ILE  |
| chr10      | 30768248 | G         | A          | 0.741379 | 0.320755 | MISSENSE  | C10H11ORF63       | c.544G>A; p.VAL182ILE  |
| chr10      | 30768290 | T         | G          | 0.712329 | 0.263158 | MISSENSE  | C10H11ORF63       | c.586T>G; p.SER196ALA  |
| chr17      | 52246374 | G         | C          | 0.820513 | 0.310345 | MISSENSE  | NOL10             | c.2117G>C; p.GLY706ALA |
| chr24      | 21020005 | G         | C          | 0.71875  | 0.44186  | MISSENSE  | PLCD1A            | c.1913G>C; p.ARG638THR |
| chr25      | 14078184 | A         | T          | 0.964912 | 0.387755 | STOP_GAIN | NECK2A2B          | c.630T>A; p.TYR210*    |
| chr25      | 19075276 | G         | A          | 0.974684 | 0.225806 | MISSENSE  | MET               | c.649G>A; p.GLU217LYS  |
| chr25      | 19422984 | C         | T          | 1        | 0.235294 | MISSENSE  | NT5DC3            | c.1060G>A; p.ALA354THR |

**Supplementary Table 3. Fine genetic mapping of 034060 family**

| chromosome position | reference alteration | mut_vaf  | wt_vaf   | variation   | gene name          | mutation               |
|---------------------|----------------------|----------|----------|-------------|--------------------|------------------------|
| chr2                | 16093087 G           | 0.700422 | 0        | MISSENSE    | ARHGEF4            | c.1787C>A; p.PRO596GLN |
| chr4                | 3657228 G            | 0.708333 | 0.352941 | MISSENSE    | CABZ01076533.1     | c.1166C>T; p.SER389LEU |
| chr4                | 34248591 A           | 0.870968 | 0        | MISSENSE    | SI:DKKEY-207M2.4   | c.1373T>A; p.PHE458TYR |
| chr4                | 39227190 G           | 0.863636 | 0        | MISSENSE    | TRIM14 (16_OF_17)  | c.289G>A; p.GLU97LYS   |
| chr4                | 39227191 A           | 0.869565 | 0        | MISSENSE    | TRIM14 (16_OF_17)  | c.290A>G; p.GLU97GLY   |
| chr4                | 39227196 A           | 0.84     | 0        | MISSENSE    | TRIM14 (16_OF_17)  | c.295A>G; p.LYS99GLU   |
| chr4                | 39227199 A           | 0.846154 | 0        | MISSENSE    | TRIM14 (16_OF_17)  | c.298A>T; p.SER100CYS  |
| chr4                | 42343152 T           | 1        | 0        | MISSENSE    | SI:DKKEY-809.6     | c.231A>C; p.LYS77ASN   |
| chr4                | 44431365 A           | 1        | 0        | MISSENSE    | SI:DKKEY-257E4.5   | c.1153A>G; p.THR385ALA |
| chr4                | 44431386 T           | 1        | 0        | MISSENSE    | SI:DKKEY-257E4.5   | c.1174T>A; p.LEU392MET |
| chr4                | 44431387 T           | 1        | 0        | STOP_GAINED | SI:DKKEY-257E4.5   | c.1175T>A; p.LEU392*   |
| chr4                | 45905651 A           | 1        | 0        | MISSENSE    | CR450785.2         | c.1328T>A; p.ILE443ASN |
| chr4                | 45905654 C           | 1        | 0        | MISSENSE    | CR450785.2         | c.1325G>T; p.ARG442MET |
| chr4                | 52313101 T           | 0.913043 | 0        | MISSENSE    | SI:CH211-42I6.2    | c.2214T>A; p.ASN738LYS |
| chr4                | 55914869 A           | 0.73913  | 0        | MISSENSE    | SI:DKKEY-196N19.7  | c.145T>A; p.SER49THR   |
| chr7                | 50230038 T           | 0.769231 | 0.44186  | MISSENSE    | ACANA              | c.1342T>C; p.SER448PRO |
| chr7                | 51344775 T           | 0.703704 | 0.48     | MISSENSE    | CD44A              | c.574A>G; p.THR192ALA  |
| chr8                | 2364257 G            | 1        | 0        | MISSENSE    | CT583679.1         | c.883G>T; p.ALA295SER  |
| chr8                | 2404776 C            | 0.730769 | 0.477273 | MISSENSE    | SI:DKKEYP-117B11.2 | c.1924G>A; p.GLY642SER |
| chr11               | 18663825 T           | 0.772727 | 0        | MISSENSE    | CABZ01112215.2     | c.905A>G; p.TYR302CYS  |
| chr11               | 18663826 A           | 0.772727 | 0        | MISSENSE    | CABZ01112215.2     | c.904T>A; p.TYR302ASN  |
| chr12               | 47020314 C           | 0.709677 | 0        | MISSENSE    | CABZ01048958.1     | c.1490G>T; p.TRP497LEU |
| chr13               | 7020171 G            | 0.710526 | 0.489362 | MISSENSE    | NINL               | c.616G>A; p.GLY206ARG  |
| chr17               | 52246374 G           | 0.72     | 0.36     | MISSENSE    | NOL10              | c.2117G>C; p.GLY706ALA |
| chr19               | 11320174 T           | 0.761905 | 0.366667 | MISSENSE    | SLC9A3.1           | c.2188A>G; p.ILE730VAL |
| chr20               | 42830675 A           | 1        | 0        | MISSENSE    | SI:CH211-215M21.11 | c.1072A>C; p.THR358PRO |
| chr20               | 42869172 A           | 0.77193  | 0        | MISSENSE    | SI:CH211-215M21.13 | c.407A>C; p.GLN136PRO  |
| chr25               | 2859707 G            | 0.710145 | 0        | MISSENSE    | CABZ01048092.1     | c.684C>A; p.PHE228LEU  |
| chr25               | 19075478 T           | 1        | 0.425    | MISSENSE    | MET                | c.851T>A; p.ILE284ASN  |

**Supplementary Table 4. Oligonucleotides used in this paper**

| Gene           | Primer ID       | Sequence (5' to 3')    |
|----------------|-----------------|------------------------|
| <i>tshba</i>   | tshba probe F   | TTAATGAAGGTTGCCGTGCC   |
| <i>tshba</i>   | tshba probe R   | TCCTCGGGGTACAGATGATG   |
| <i>tg</i>      | tg probe F      | GTACCACTTACCTGAAAACG   |
| <i>tg</i>      | tg probe R      | TGCTTGGAGTCAGAGTGAAG   |
| <i>gcm2</i>    | gcm2 probe F    | CTACTACAATAGTGACTACC   |
| <i>gcm2</i>    | gcm2 probe R    | AATTTTTTATTCCTTTAAAAC  |
| <i>calca</i>   | calca probe F   | ATGGTTATGTTGAAGATCTCC  |
| <i>calca</i>   | calca probe R   | AGTGTCCATTCCCAGGGTTC   |
| <i>nis</i>     | nis probe F     | ATGAGGTTTGGCAGAGGGATG  |
| <i>nis</i>     | nis probe R     | AACCAGACCATAGTGCCACCC  |
| <i>tpo</i>     | tpo probe F     | CTTGGACAGA GTTGAATCTC  |
| <i>tpo</i>     | tpo probe R     | GCATCATCAGGCTGTTCTCT   |
| <i>nkx2.4b</i> | nkx2.4b probe F | ATGTCCTTGAGCCCCAAACA   |
| <i>nkx2.4b</i> | nkx2.4b probe R | TCCATTCCCGGTAACGTGC    |
| <i>foxe1</i>   | foxe1 probe F   | ATGCCTGTGGTTAAAGTGGA   |
| <i>foxe1</i>   | foxe1 probe R   | ACAAACCTGTCCATATTACC   |
| <i>met</i>     | met probe F     | TGTGGTCATCGCAAGAGAAG   |
| <i>met</i>     | met probe R     | AGTTCCCACAGCAAAACACC   |
| <i>hgfa</i>    | hgfa probe F    | TGGA CTGCCTCAGTGTT CAG |
| <i>hgfa</i>    | hgfa probe R    | AATGCTGACCACCCA ACTTC  |
